# Supplementary material for: Laser Powder Bed Fusion Additive Manufacturing of a Low-Modulus Ti–35Nb–7Zr–5Ta Alloy for Orthopedic Applications
Source: PubMed Central journal article supplement — ACS Omega. 2022 Mar 1;7(10):8506–17. doi: 10.1021/acsomega.1c06261 (PMC8928530; doi:10.1021/acsomega.1c06261), 2022-03-01
Supplement: ao1c06261_si_001.pdf [file ao1c06261_si_001.pdf]

## Supplementary Information

### **Laser Powder Bed Fusion Additive Manufacturing of a Low Modulus Ti-35Nb-7Zr-5Ta Alloy for Orthopedic Applications**

Naresh Nadammal<sup>1</sup>, Monika Rajput<sup>1</sup>, Saurabh Gupta<sup>1</sup>, Eugene Ivanov<sup>2</sup>, Anigani Sudarshan Reddy<sup>3</sup>,  
Satyam Suwas<sup>1</sup>, Kaushik Chatterjee<sup>1\*</sup>

<sup>1</sup>Department of Materials Engineering, Indian Institute of Science, Bangalore, India 560012

<sup>2</sup>Tosoh SMD Inc., Grove City, OH, USA 43123

<sup>3</sup>Intech Additive Solutions, Peenya Industrial Area, Bangalore, India 560058

\*Corresponding author:

[kchatterjee@iisc.ac.in](mailto:kchatterjee@iisc.ac.in); +91-80-22933408

**Table S1:** X-Ray diffraction analysis results from the first four BCC peaks

| <b>Energy Density<br/>(J/mm<sup>3</sup>)</b> | <b>2<math>\theta</math><br/>(<math>^{\circ}</math>)</b> | <b>FWHM<br/>(<math>^{\circ}</math>)</b> | <b>Crystallite Size<br/>D (nm)</b> | <b>Dislocation<br/>Density (nm<sup>-2</sup>)</b> | <b>Microstrain<br/>(<math>\times 10^{-4}</math>)</b> |
|----------------------------------------------|---------------------------------------------------------|-----------------------------------------|------------------------------------|--------------------------------------------------|------------------------------------------------------|
| <b>46.6</b>                                  | 38.44                                                   | 0.047                                   | 180.5                              | 0.03                                             | 5.833                                                |
|                                              | 55.59                                                   | 0.105                                   | 85.16                              | 0.138                                            | 8.729                                                |
|                                              | 69.67                                                   | 0.124                                   | 78.24                              | 0.163                                            | 7.755                                                |
|                                              | 82.58                                                   | 0.128                                   | 82.32                              | 0.148                                            | 6.381                                                |
| <b>48.9</b>                                  | 38.62                                                   | 0.046                                   | 181.38                             | 0.03                                             | 5.779                                                |
|                                              | 55.74                                                   | 0.146                                   | 61.76                              | 0.262                                            | 12.007                                               |
|                                              | 69.83                                                   | 0.114                                   | 84.99                              | 0.138                                            | 7.126                                                |
|                                              | 82.72                                                   | 0.128                                   | 82.44                              | 0.147                                            | 6.362                                                |
| <b>50.0</b>                                  | 38.30                                                   | 0.047                                   | 179.84                             | 0.031                                            | 5.875                                                |
|                                              | 55.43                                                   | 0.105                                   | 85.15                              | 0.138                                            | 8.753                                                |
|                                              | 69.53                                                   | 0.113                                   | 85.25                              | 0.137                                            | 7.131                                                |
|                                              | 82.45                                                   | 0.178                                   | 59.18                              | 0.285                                            | 8.888                                                |
| <b>54.8</b>                                  | 38.20                                                   | 0.147                                   | 57.24                              | 0.305                                            | 18.506                                               |
|                                              | 55.35                                                   | 0.145                                   | 61.71                              | 0.263                                            | 12.093                                               |
|                                              | 69.48                                                   | 0.183                                   | 52.73                              | 0.359                                            | 11.536                                               |
|                                              | 82.42                                                   | 0.178                                   | 59.16                              | 0.286                                            | 8.893                                                |
